# Supplementary material for: Molecular characterization, tissue expression and polymorphisms of buffalo PPARGC1A gene
Source: PubMed Central journal article supplement (PMC7405651; doi:10.5194/aab-63-249-2020), 2020-07-22
Supplement: aab-63-249-supplement.pdf [file aab-63-249-supplement.pdf]

Supplement of Arch. Anim. Breed., 63, 249–259, 2020  
<https://doi.org/10.5194/aab-63-249-2020-supplement>  
© Author(s) 2020. This work is distributed under  
the Creative Commons Attribution 4.0 License.

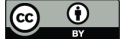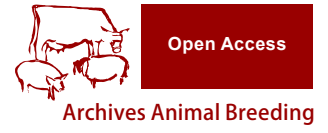

*Supplement of*

## **Molecular characterization, tissue expression and polymorphisms of buffalo *PPARGC1A* gene**

**Lihua Qiu et al.**

*Correspondence to:* Yongwang Miao (yongwangmiao1@126.com)

The copyright of individual parts of the supplement might differ from the CC BY 4.0 License.

**Table S1.** Data information for tissue differential expression of buffalo *PPARGC1A* gene

| Tissues         | Relative expression level (mean $\pm$ standard error)* |                      | <i>P</i> values |
|-----------------|--------------------------------------------------------|----------------------|-----------------|
|                 | lactation                                              | non-lactation        |                 |
| Muscle          | 23.1816 $\pm$ 0.9303                                   | 39.3687 $\pm$ 5.4650 | 0.0432          |
| Heart           | 18.3880 $\pm$ 1.3240                                   | 9.4338 $\pm$ 0.8944  | 0.0050          |
| Liver           | 9.7518 $\pm$ 0.2973                                    | 5.3388 $\pm$ 0.4343  | 0.0011          |
| Brain           | 6.4906 $\pm$ 0.3496                                    | 5.5206 $\pm$ 0.1164  | 0.0580          |
| Kidney          | 2.8722 $\pm$ 0.2056                                    | 4.6320 $\pm$ 0.5773  | 0.1038          |
| Small intestine | 0.3704 $\pm$ 0.0348                                    | 0.9644 $\pm$ 0.0181  | 0.0001          |
| Mammary gland   | 0.1404 $\pm$ 0.0239                                    | 0.6643 $\pm$ 0.0404  | 0.0004          |
| Rumen           | 0.0558 $\pm$ 0.0097                                    | 0.4843 $\pm$ 0.0293  | 0.0002          |
| Spleen          | 0.3268 $\pm$ 0.0410                                    | 0.0899 $\pm$ 0.0204  | 0.0066          |
| Lung            | 0.0989 $\pm$ 0.0166                                    | 0.0150 $\pm$ 0.0004  | 0.0297          |

\*The values are the average values for each tissue in four lactating or four non-lactating buffaloes.
